# Supplementary material for: Rapid determination and conversion study of 5-hydroxymethylfurfural and its derivatives in glucose injection
Source: Royal Society of Chemistry journal article supplement (doi:10.1039/c8nj03019g), 2018-01-01
Supplement: c8nj03019g1.pdf [file c8nj03019g1.pdf]

*Supporting Information for*

**Rapid Determination and Conversion Study of  
5-Hydroxymethylfurfural and Its Derivatives in Glucose Injection**

Cheng Wang<sup>a</sup>, Yajing Hou<sup>a</sup>, Yuanyuan Lin<sup>a</sup>, Yitong Xie<sup>a</sup>, Di Wei<sup>a</sup>, Nan Zhou<sup>b</sup>, Huaizhen He<sup>a\*</sup>

<sup>a</sup> *School of Pharmacy, Xi'an Jiaotong University, Xi'an 710061, China.*

<sup>b</sup> *Department of Pharmacy, Shaanxi Provincial People's Hospital, Xi'an, China*

\*E-mail: hehuaizhen@mai.xjtu.edu.cn; Tel: +86-29-82657740, Fax: +86-29-82655451

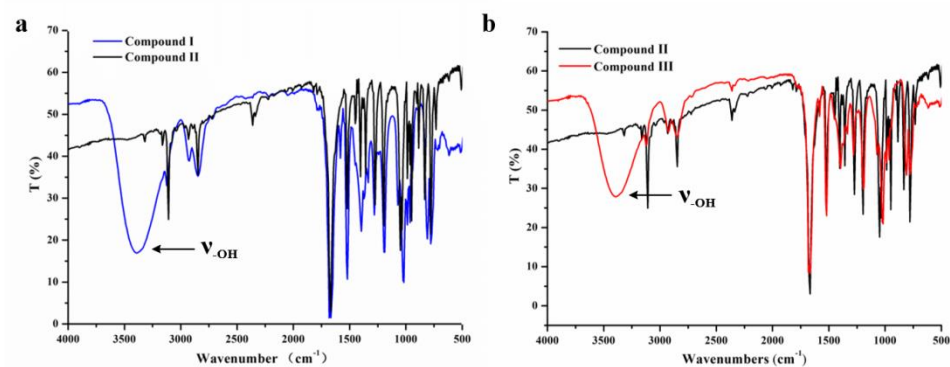

**Figure S1. Comparison of typical IR spectra for Compounds I-III.**

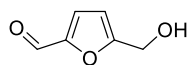

Chemical Formula:  $C_6H_6O_3$

Exact Mass: 126.03

Molecular Weight: 126.11

m/z: 126.03 (100.0%), 127.04 (6.5%)

Elemental Analysis: C, 57.14; H, 4.80; O, 38.06

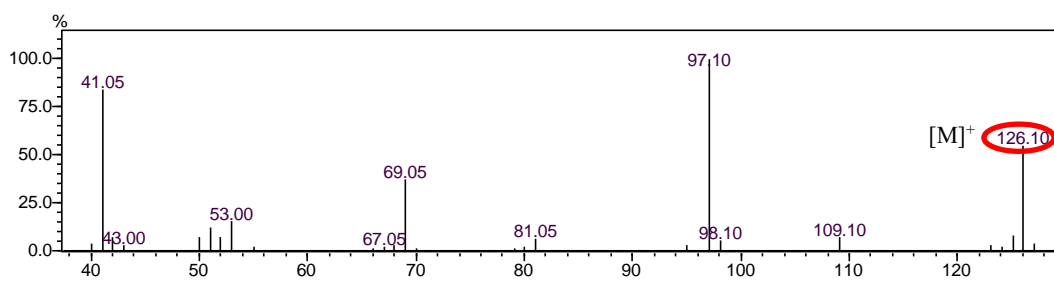

**Figure S2. GC-MS data of compound I**

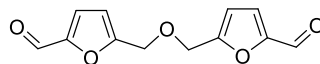

Chemical Formula:  $C_{12}H_{10}O_5$

Exact Mass: 234.05

Molecular Weight: 234.21

m/z: 234.05 (100.0%), 235.06 (13.0%), 236.06 (1.0%)

Elemental Analysis: C, 61.54; H, 4.30; O, 34.16

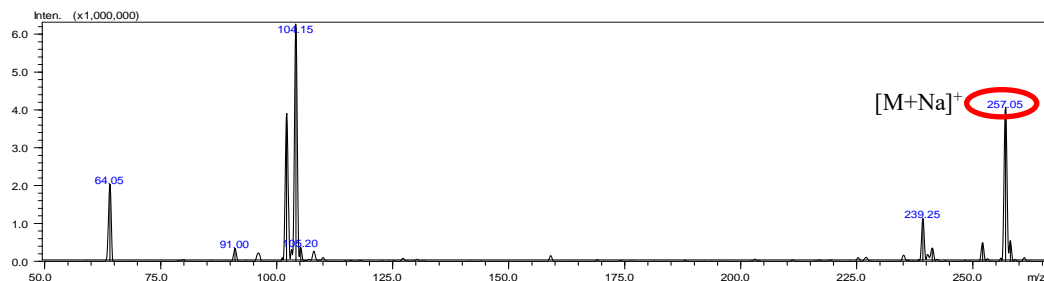

**Figure S3. ESI-MS data of compound II**

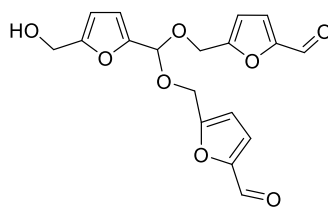

Chemical Formula:  $C_{18}H_{16}O_8$   
 Exact Mass: 360.08  
 Molecular Weight: 360.32  
 m/z: 360.08 (100.0%), 361.09 (19.5%), 362.09 (1.8%), 362.09 (1.6%)  
 Elemental Analysis: C, 60.00; H, 4.48; O, 35.52

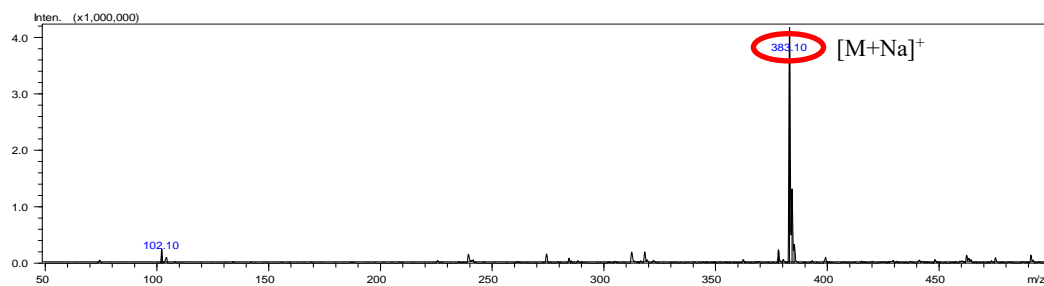

Figure S4. ESI-MS/MS data of compound III

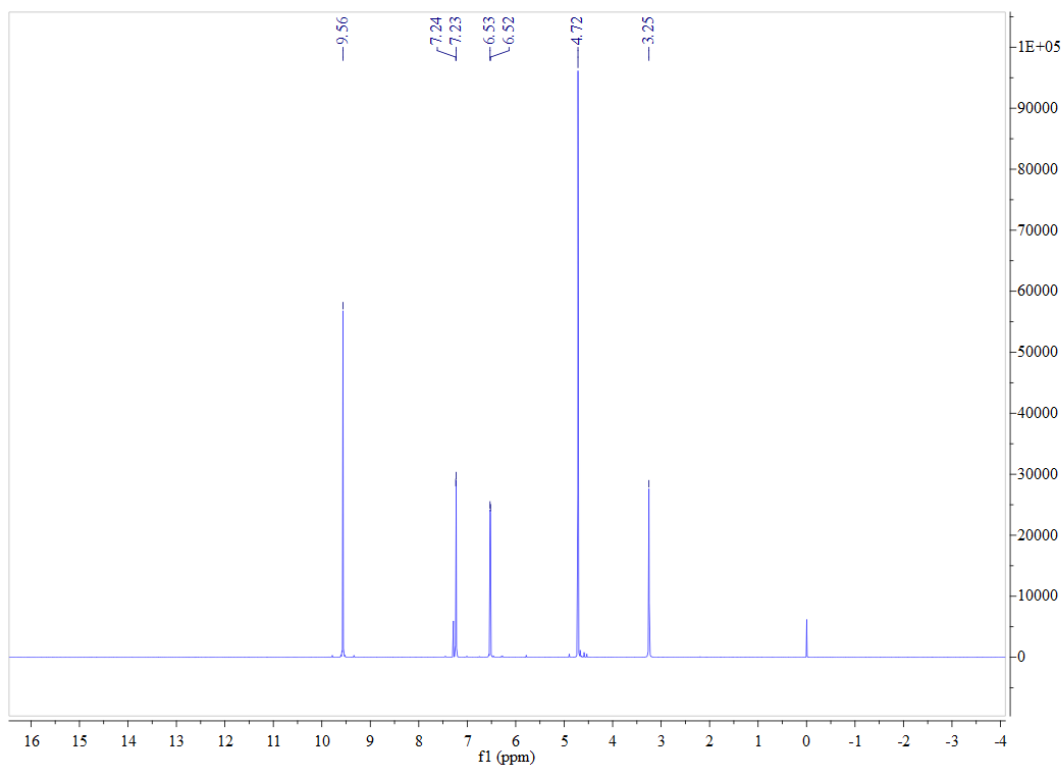

Figure S5.  $^1H$  NMR of compound I

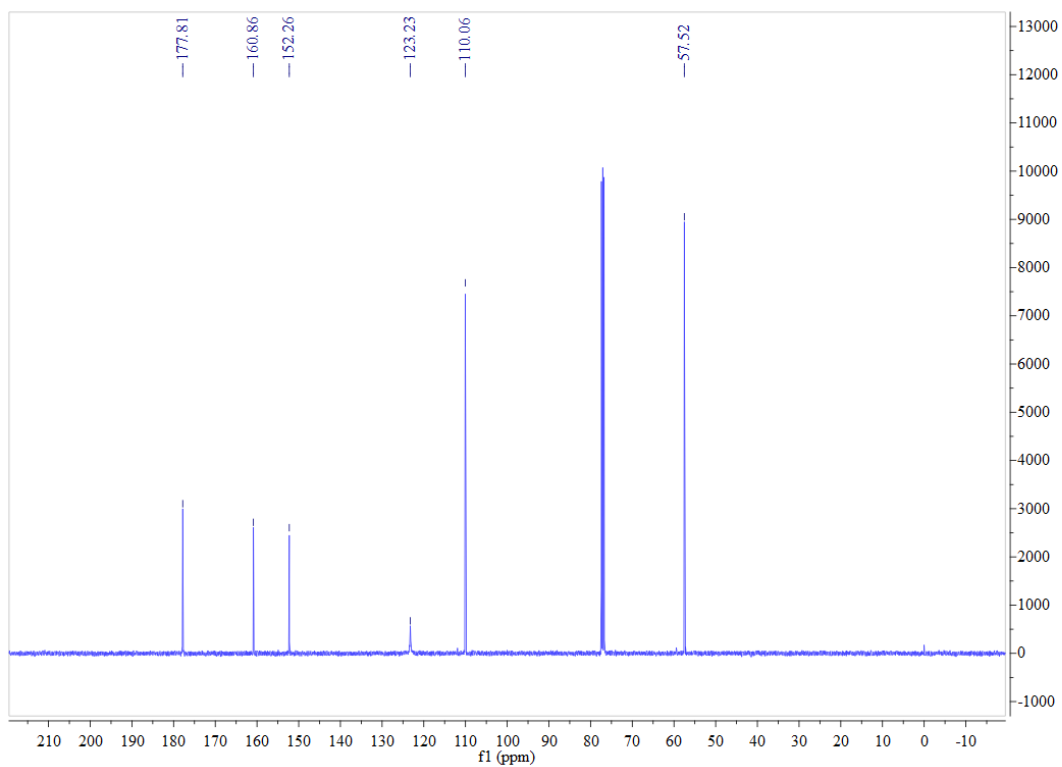

**Figure S6.  $^{13}\text{C}$  NMR of compound I**

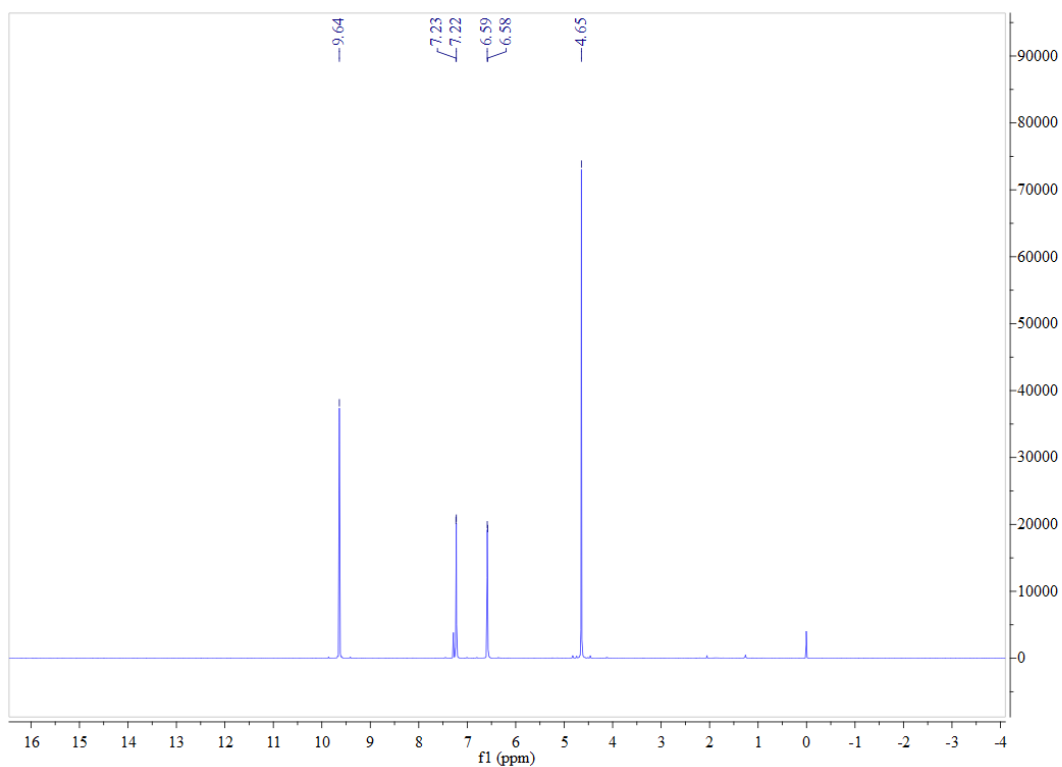

**Figure S7.  $^1\text{H}$  NMR of compound II**

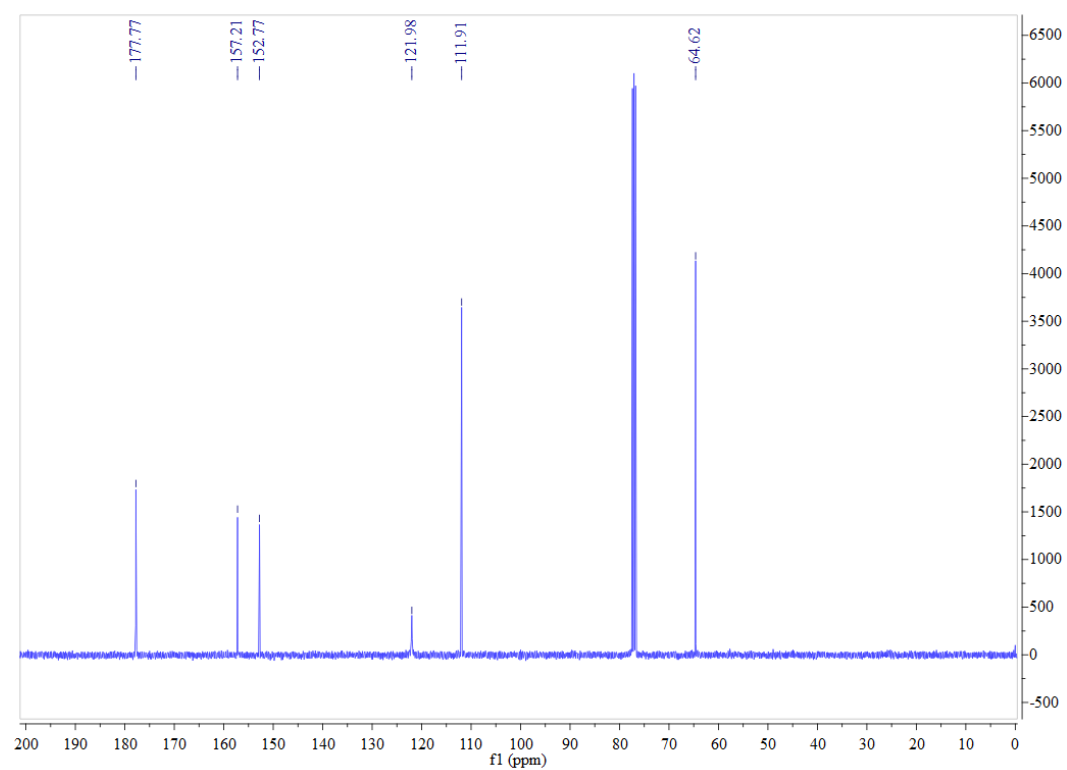

**Figure S8. <sup>13</sup>C NMR of compound II**

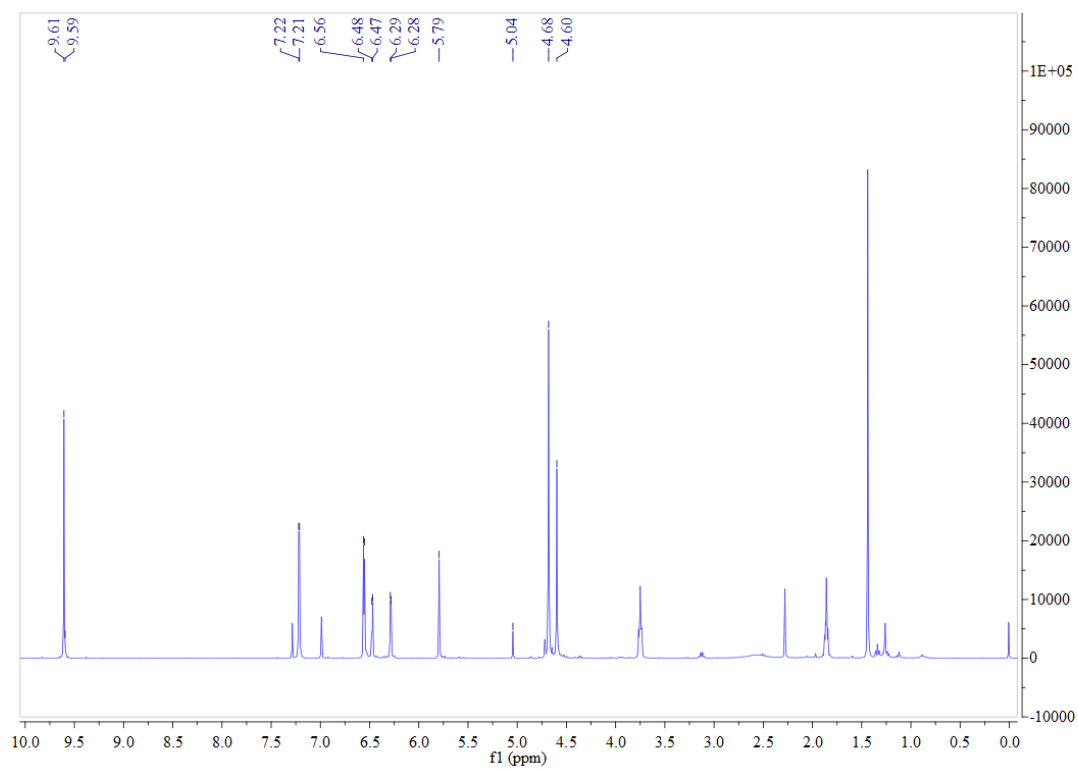

**Figure S9. <sup>1</sup>H NMR of compound III**

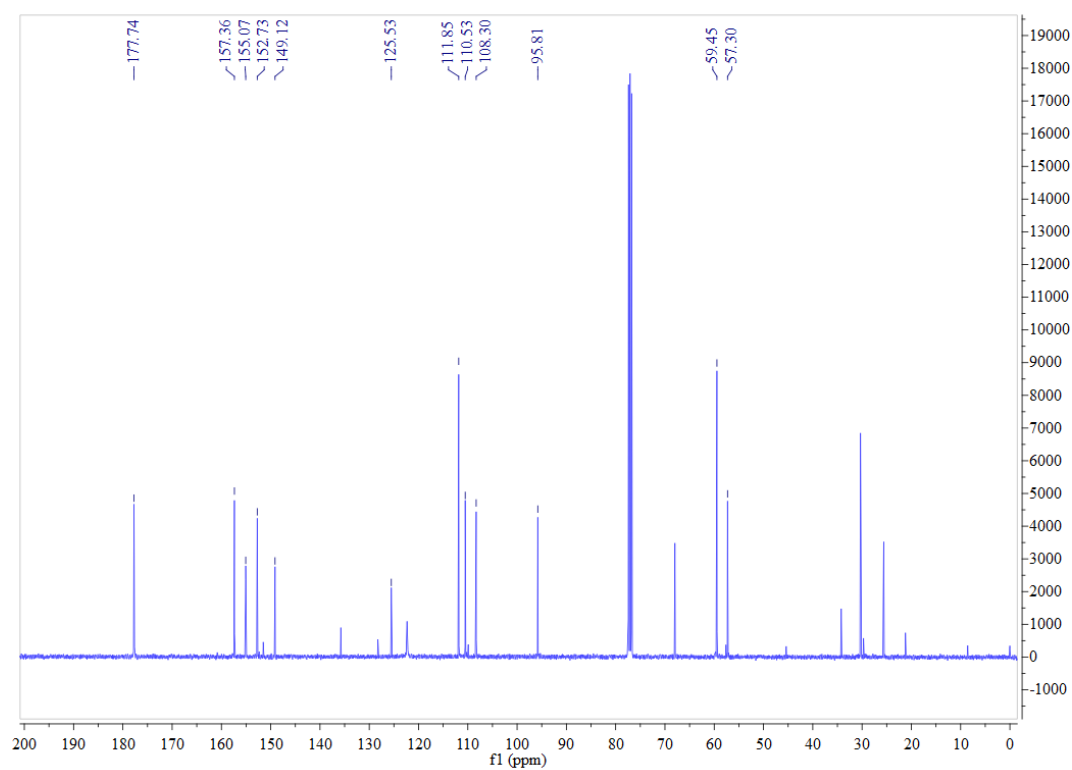

**Figure S10. <sup>13</sup>C NMR of compound III**

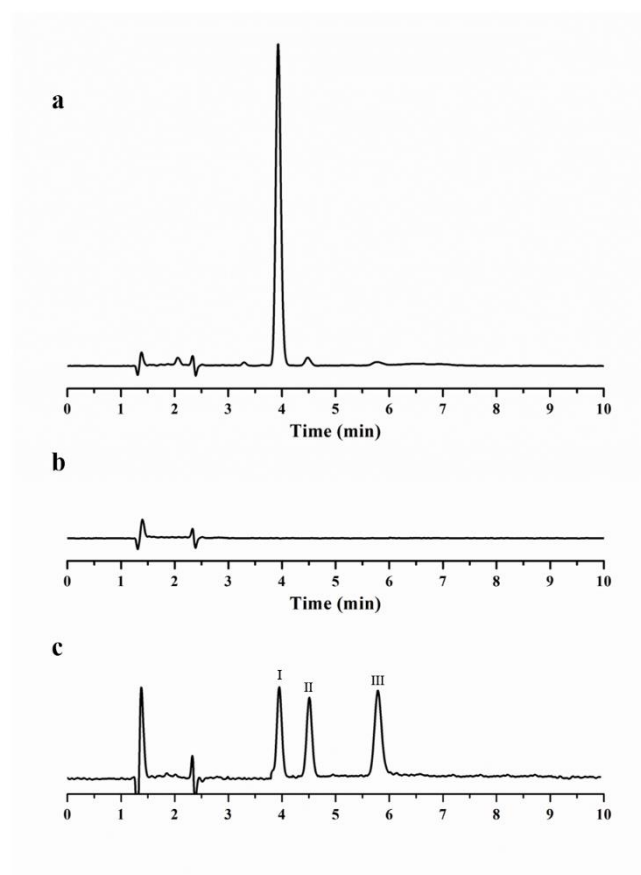

**Figure S11. HPLC for sample, control and standard (a: HPLC for glucose injection; b: HPLC for control; c: HPLC for standard compounds.**
